# Supplementary material for: Higher burden of cardiometabolic and socioeconomic risk factors in women with type 2 diabetes: an analysis of the Glycemic Reduction Approaches in Diabetes (GRADE) baseline cohort
Source: HighWire-hosted journal article supplement (doi:10.1136/bmjdrc-2022-003159), 2023-04-01
Supplement: bmjdrc-2022-003159supp001_data_supplement.pdf [file bmjdrc-2022-003159supp001_data_supplement.pdf]

**Table S.1.** Sex differences in BMI and Waist Circumference, stratified by age, income, education, race, ethnicity.

|                             | BMI (kg/m <sup>2</sup> ) |            |         | Increased Waist Circumference* |              |         |
|-----------------------------|--------------------------|------------|---------|--------------------------------|--------------|---------|
|                             | Men                      | Women      | p-value | Men                            | Women        | p-value |
| <b>Age categories</b>       |                          |            |         |                                |              |         |
| <45 years                   | 35.2 ± 7.4               | 37.6 ± 8.5 | 0.051   | 258 (74.8%)                    | 256 (93.1%)  | 0.133   |
| 45-54 years                 | 34.6 ± 6.8               | 36 ± 7.7   |         | 677 (79.2%)                    | 538 (93.1%)  |         |
| 55-64 years                 | 33.5 ± 5.9               | 35 ± 7.1   |         | 856 (79%)                      | 647 (93.6%)  |         |
| ≥65 years                   | 32.4 ± 5.4               | 32.8 ± 5.9 |         | 741 (80.5%)                    | 258 (90.2%)  |         |
| <b>Income</b>               |                          |            |         |                                |              |         |
| <\$10,000                   | 33.1 ± 6.9               | 34.1 ± 7.4 | 0.193   | 102 (69.9%)                    | 132 (88.6%)  | 0.486   |
| \$10,000 - \$50,000         | 33.8 ± 6.5               | 36.2 ± 8   |         | 897 (77.3%)                    | 723 (93.1%)  |         |
| \$50,000 - \$75,000         | 33.8 ± 5.8               | 35.3 ± 7.2 |         | 435 (82.5%)                    | 239 (92.6%)  |         |
| \$75,000+                   | 33.6 ± 6.2               | 35.3 ± 6.7 |         | 826 (82%)                      | 373 (95.4%)  |         |
| <b>Education</b>            |                          |            |         |                                |              |         |
| Some high school            | 32.4 ± 5.8               | 33.7 ± 7.1 | 0.398   | 110 (63.2%)                    | 162 (85.7%)  | 0.699   |
| High school graduate        | 33.7 ± 6.1               | 35.1 ± 7.6 |         | 485 (76.7%)                    | 370 (91.1%)  |         |
| Some college                | 34.3 ± 6.7               | 36.1 ± 7.4 |         | 776 (81.8%)                    | 486 (95.1%)  |         |
| College graduate or more    | 33.3 ± 6.1               | 35.5 ± 7.5 |         | 1161 (80.1%)                   | 680 (94.1%)  |         |
| <b>Race</b>                 |                          |            |         |                                |              |         |
| White                       | 33.9 ± 6.3               | 35.8 ± 7.3 | 0.671   | 1855 (81.2%)                   | 953 (93.2%)  | 0.242   |
| Black or African American   | 33.7 ± 6.2               | 35.3 ± 7.8 |         | 366 (74.8%)                    | 466 (92.1%)  |         |
| Other or more than one race | 32 ± 6.3                 | 34.2 ± 6.9 |         | 284 (72.6%)                    | 255 (93.1%)  |         |
| <b>Ethnicity</b>            |                          |            |         |                                |              |         |
| Hispanic/Latino             | 32.9 ± 6                 | 33.7 ± 6.9 | 0.01    | 309 (61.7%)                    | 374 (88.2%)  | 0.224   |
| Non-Hispanic/Latino         | 33.8 ± 6.3               | 35.9 ± 7.5 |         | 2205 (82.3%)                   | 1309 (94.3%) |         |

\* Increased waist circumference ≥88 cm for females, ≥102 cm for males (for Asian Americans, ≥80 cm for females, ≥90 cm for males)

The nominal p-value for the interaction term between sex and the sociodemographic variable (i.e., age, income, education, race, or ethnicity) is provided to explore whether sex differences vary by the sociodemographic variable, and so should not be interpreted as testing hypotheses.

**Table S.2.** Sex differences in LDL levels, stratified by age, income, education, race, ethnicity.

|                             | LDL (mg/dL), on statins |             |         | LDL <100 mg/dL, on statin |             |         |
|-----------------------------|-------------------------|-------------|---------|---------------------------|-------------|---------|
|                             | Men                     | Women       | p-value | Men                       | Women       | p-value |
| <b>Age categories</b>       |                         |             |         |                           |             |         |
| <45 years                   | 84.8 ± 29.1             | 92.5 ± 32   | 0.941   | 106 (75.7%)               | 50 (65.8%)  | 0.134   |
| 45-54 years                 | 83.5 ± 31               | 91.3 ± 31   |         | 347 (72%)                 | 192 (65.8%) |         |
| 55-64 years                 | 78.5 ± 26.8             | 87.2 ± 30.7 |         | 607 (79.9%)               | 316 (73.1%) |         |
| ≥65 years                   | 74.6 ± 25.6             | 84.1 ± 27   |         | 624 (86.7%)               | 153 (73.6%) |         |
| <b>Income</b>               |                         |             |         |                           |             |         |
| <\$10,000                   | 84.9 ± 34.2             | 89.2 ± 34.7 | 0.388   | 47 (66.2%)                | 42 (61.8%)  | 0.719   |
| \$10,000 - \$50,000         | 80.7 ± 29.2             | 88.4 ± 32.3 |         | 561 (77.5%)               | 286 (72%)   |         |
| \$50,000 - \$75,000         | 77.6 ± 28.9             | 89.8 ± 31.6 |         | 270 (79.6%)               | 110 (70.1%) |         |
| > \$75,000                  | 76.3 ± 24.5             | 83.6 ± 23.7 |         | 612 (84.2%)               | 188 (76.7%) |         |
| <b>Education</b>            |                         |             |         |                           |             |         |
| Some high school            | 86.9 ± 29.3             | 94.2 ± 37.7 | 0.802   | 67 (71.3%)                | 55 (60.4%)  | 0.777   |
| High school graduate        | 81.7 ± 28.8             | 91.3 ± 29.1 |         | 309 (76.9%)               | 148 (65.2%) |         |
| Some college                | 78.5 ± 28.8             | 91.3 ± 29.1 |         | 478 (79%)                 | 191 (72.9%) |         |
| College graduate or more    | 76.9 ± 26.5             | 86.7 ± 29.3 |         | 830 (82.9%)               | 317 (74.1%) |         |
| <b>Race</b>                 |                         |             |         |                           |             |         |
| White                       | 75.6 ± 25.8             | 84.5 ± 28.7 | 0.123   | 1299 (84%)                | 441 (75%)   | 0.023   |
| Black or African American   | 91.3 ± 31.8             | 94.9 ± 32.6 |         | 189 (61.6%)               | 170 (61.4%) |         |
| Other or more than one race | 81.8 ± 29.6             | 91.3 ± 30.2 |         | 182 (79.8%)               | 89 (69%)    |         |
| <b>Ethnicity</b>            |                         |             |         |                           |             |         |
| Hispanic/Latino             | 85.6 ± 31.9             | 92.4 ± 36.2 | 0.367   | 177 (71.7%)               | 119 (63%)   | 0.573   |
| Non-Hispanic/Latino         | 77.7 ± 27.1             | 87.3 ± 28.7 |         | 1498 (81.4%)              | 585 (72.1%) |         |

The nominal p-value for the interaction term between sex and the sociodemographic variable (i.e., age, income, education, race, or ethnicity) is provided to explore whether sex differences vary by the sociodemographic variable, and so should not be interpreted as testing hypotheses.

**Table S.3.** Sex differences in low HDL and Blood Pressure, stratified by age, income, education, race, ethnicity.

|                             | Low HDL <sup>a</sup> |             |         | BP <140/90, on medication |             |         |
|-----------------------------|----------------------|-------------|---------|---------------------------|-------------|---------|
|                             | Men                  | Women       | p-value | Men                       | Women       | p-value |
| <b>Age categories</b>       |                      |             |         |                           |             |         |
| <45 years                   | 174 (50.3%)          | 231 (83.4%) | <0.001  | 106 (71.1%)               | 94 (74.6%)  | 0.835   |
| 45-54 years                 | 429 (50.3%)          | 392 (67.6%) |         | 395 (73.7%)               | 262 (72.6%) |         |
| 55-64 years                 | 493 (45.5%)          | 402 (58.3%) |         | 571 (70.1%)               | 374 (72.2%) |         |
| ≥65 years                   | 409 (44.3%)          | 148 (51.6%) |         | 547 (71.7%)               | 164 (72.6%) |         |
| <b>Income</b>               |                      |             |         |                           |             |         |
| <\$10,000                   | 66 (45.2%)           | 95 (63.3%)  | 0.349   | 56 (60.2%)                | 67 (73.6%)  | 0.366   |
| \$10,000 - \$50,000         | 586 (50.5%)          | 508 (65.3%) |         | 575 (70%)                 | 366 (69.7%) |         |
| \$50,000 - \$75,000         | 264 (50.1%)          | 169 (65.3%) |         | 275 (72.8%)               | 136 (73.9%) |         |
| >\$75,000                   | 422 (41.9%)          | 249 (63.5%) |         | 544 (75.1%)               | 209 (76.3%) |         |
| <b>Education</b>            |                      |             |         |                           |             |         |
| Some high school            | 78 (44.8%)           | 106 (55.8%) | 0.42    | 69 (72.6%)                | 82 (71.9%)  | 0.326   |
| High school graduate        | 298 (47.3%)          | 273 (67.1%) |         | 320 (70.6%)               | 199 (75.7%) |         |
| Some college                | 483 (50.9%)          | 352 (69%)   |         | 471 (69.1%)               | 259 (72.1%) |         |
| College graduate or more    | 646 (44.5%)          | 441 (60.7%) |         |                           |             |         |
| <b>Race</b>                 |                      |             |         |                           |             |         |
| White                       | 1173 (51.4%)         | 707 (69%)   | 0.008   | 1184 (72.5%)              | 500 (72.9%) | 0.13    |
| Black or African American   | 161 (32.8%)          | 258 (50.8%) |         | 224 (62.9%)               | 271 (70.9%) |         |
| Other or more than one race | 156 (39.9%)          | 195 (71.2%) |         | 191 (77.3%)               | 112 (75.7%) |         |
| <b>Ethnicity</b>            |                      |             |         |                           |             |         |
| Hispanic/Latino             | 221 (44%)            | 298 (69.8%) | 0.002   | 178 (67.7%)               | 163 (71.5%) | 0.544   |
| Non-Hispanic/Latino         | 1273 (47.5%)         | 868 (62.5%) |         | 1429 (72%)                | 725 (73%)   |         |

<sup>a</sup> Low HDL <50 mg/dL for females, <40 mg/dL for males

The nominal p-value for the interaction term between sex and the sociodemographic variable (i.e., age, income, education, race, or ethnicity) is provided to explore whether sex differences vary by the sociodemographic variable, and so should not be interpreted as testing hypotheses.

**Table S.4.** Exploratory analysis results for prevalence of cardiometabolic risk factors by sex, stratified by age, education, race, ethnicity, and income.

| CVD Risk Factor                                                   | P-value for interaction between sex and |           |          |           |        |
|-------------------------------------------------------------------|-----------------------------------------|-----------|----------|-----------|--------|
|                                                                   | Age                                     | Education | Race     | Ethnicity | Income |
| BMI (kg/m <sup>2</sup> )                                          | 0.051                                   | 0.398     | 0.671    | 0.01      | 0.193  |
| Waist circumference $\geq$ gender-specific threshold <sup>a</sup> | 0.133                                   | 0.699     | 0.242    | 0.224     | 0.486  |
| Insulin sensitivity (HOMA2-S%)                                    | 0.212                                   | 0.677     | 0.03     | 0.65      | 0.647  |
| Insulin secretion (Insulinogenic index)                           | 0.756                                   | 0.789     | 0.041    | 0.81      | 0.179  |
| HDL $<$ gender-specific threshold <sup>b</sup>                    | $<0.001$                                | 0.42      | 0.008    | 0.002     | 0.349  |
| Triglycerides (mg/dL)                                             | 0.323                                   | 0.828     | 0.239    | 0.777     | 0.129  |
| Metabolic Syndrome                                                | 0.292                                   | 0.338     | 0.503    | 0.161     | 0.706  |
| Depression/anxiety medications (%) <sup>c</sup>                   | 0.922                                   | 0.113     | 0.57     | 0.085     | 0.14   |
| ASCVD risk score (%) <sup>d</sup>                                 | $<0.001$                                | 0.038     | $<0.001$ | $<0.02$   | 0.16   |
| Heart attack or stroke (%)                                        | 0.338                                   | 0.121     | 0.832    | 0.671     | 0.546  |

<sup>a</sup> Normal waist circumference  $<88$  cm for females,  $<102$  cm for males (for Asian Americans,  $<80$  cm for females,  $<90$  cm for males).

<sup>b</sup> Normal HDL  $\geq 50$  mg/dL for females,  $\geq 40$  mg/dL for males.

<sup>c</sup> This question was added after the study started and was answered by 2494 participants at baseline.

<sup>d</sup> Estimated 10-year ASCVD risk. ASCVD risk scores are intended for primary prevention of CVD only, and so this variable is analyzed only for those without history of heart attack or stroke.

The nominal p-value for the interaction term between sex and the sociodemographic variable (i.e., age, income, education, race, or ethnicity) is provided to explore whether sex differences vary by the sociodemographic variable, and so should not be interpreted as testing hypotheses.

**Table S.5.** Exploratory analysis results for evidence-based treatments for lipid and blood pressure management by sex, stratified by age, education, race, ethnicity, and income.

| CVD Risk Factor                                                      | P-value for interaction between sex and |           |        |           |        |
|----------------------------------------------------------------------|-----------------------------------------|-----------|--------|-----------|--------|
|                                                                      | Age                                     | Education | Race   | Ethnicity | Income |
| LDL (mg/dL) in entire cohort                                         | 0.006                                   | 0.181     | 0.025  | 0.02      | 0.173  |
| LDL (mg/dL) in those treated with statins                            | 0.941                                   | 0.802     | 0.123  | 0.367     | 0.388  |
| LDL < 100 mg/dL in those treated with statins                        | 0.134                                   | 0.777     | 0.023  | 0.573     | 0.719  |
| LDL (mg/dL) in those NOT treated with statins                        | 0.003                                   | 0.373     | 0.631  | 0.359     | 0.374  |
| LDL < 100 mg/dL in those NOT treated with statins                    | 0.345                                   | 0.97      | 0.253  | 0.408     | 0.536  |
| Systolic BP (mmHg) in entire cohort                                  | 0.001                                   | 0.003     | 0.152  | 0.015     | 0.255  |
| Diastolic BP (mmHg) in entire cohort                                 | 0.326                                   | 0.025     | 0.017  | <0.001    | 0.003  |
| Systolic BP (mmHg) in those treated with blood pressure medications  | 0.063                                   | 0.176     | 0.054  | 0.656     | 0.499  |
| Diastolic BP (mmHg) in those treated with blood pressure medications | 0.344                                   | 0.498     | <0.001 | 0.237     | 0.083  |
| BP <140/90 mmHg in those treated with blood pressure medications     | 0.835                                   | 0.326     | 0.13   | 0.544     | 0.336  |
| BP <130/80 mmHg in those treated with blood pressure medications     | 0.17                                    | 0.179     | <0.001 | 0.854     | 0.575  |

The nominal p-value for the interaction term between sex and the sociodemographic variable (i.e., age, income, education, race, or ethnicity) is provided to explore whether sex differences vary by the sociodemographic variable, and so should not be interpreted as testing hypotheses.
